# Supplementary material for: Evidence for Electron Transfer from the Bidirectional Hydrogenase to the Photosynthetic Complex I (NDH-1) in the Cyanobacterium Synechocystis sp. PCC 6803
Source: MDPI journal article supplement (doi:10.3390/microorganisms10081617), 2022-08-10
Supplement: s1 [file s1]

Evidence for electron transfer from the bidirectional hydrogenase to the photosynthetic complex I (NDH-1) in the cyanobacterium *Synechocystis* sp. PCC 6803

Jens Appel<sup>1,3</sup>, Sean Craig<sup>2</sup>, Marius Theune<sup>1,3</sup>, Vanessa Hüren<sup>3</sup>, Sven Künzel<sup>4</sup>, Björn Forberich<sup>3</sup>, Samantha Bryan<sup>2</sup>, Kirstin Gutekunst<sup>1,3</sup>

<sup>1</sup>Department of Molecular Plant Physiology, Bioenergetics in Photoautotrophs, University of Kassel, D-34132 Kassel, Germany

<sup>2</sup>BBSRC/EPSRC Synthetic Biology Research Centre, The Biodiscovery Institute, University of Nottingham, Nottingham, NG7 2RD, UK

<sup>3</sup>Department of Biology, Botanical Institute, Christian-Albrechts-University, D-24118 Kiel, Germany

<sup>4</sup>Max-Planck Institute for Evolutionary Biology, August-Thienemann-Straße 2, D-24306 Plön, Germany

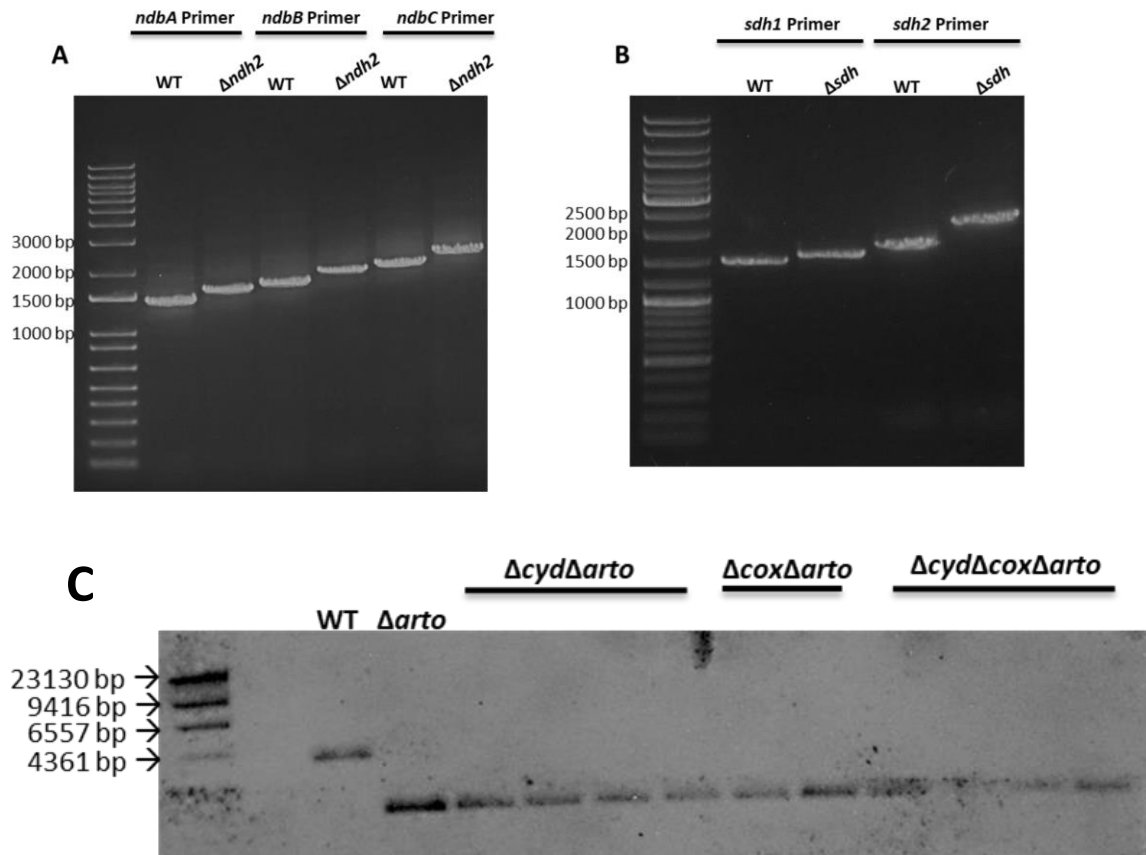

**Figure S1.** Agarose gels of PCR and southern hybridization to test segregation of the mutants. A) the deletion mutant of all the different type 2 dehydrogenase genes, B) the deletion mutant of the two *sdhB* genes, C) deletion strain of all the respiratory terminal oxidases ( $\Delta cyd\Delta cox\Delta art$ ) called  $\Delta ox$  in this study.

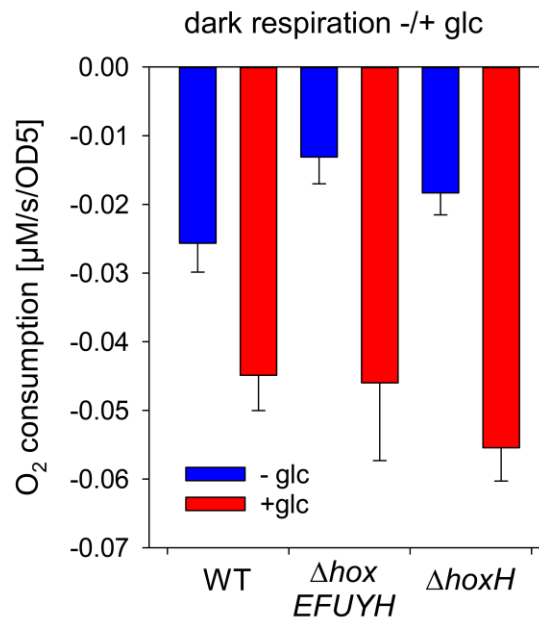

**Figure S2.** Dark oxygen consumption before and after addition of 10 mM glucose. The respiratory activity is given as  $\mu M$   $O_2$  consumed per second and at a density of  $OD_{750} = 5$ . Error bars show the standard deviation.

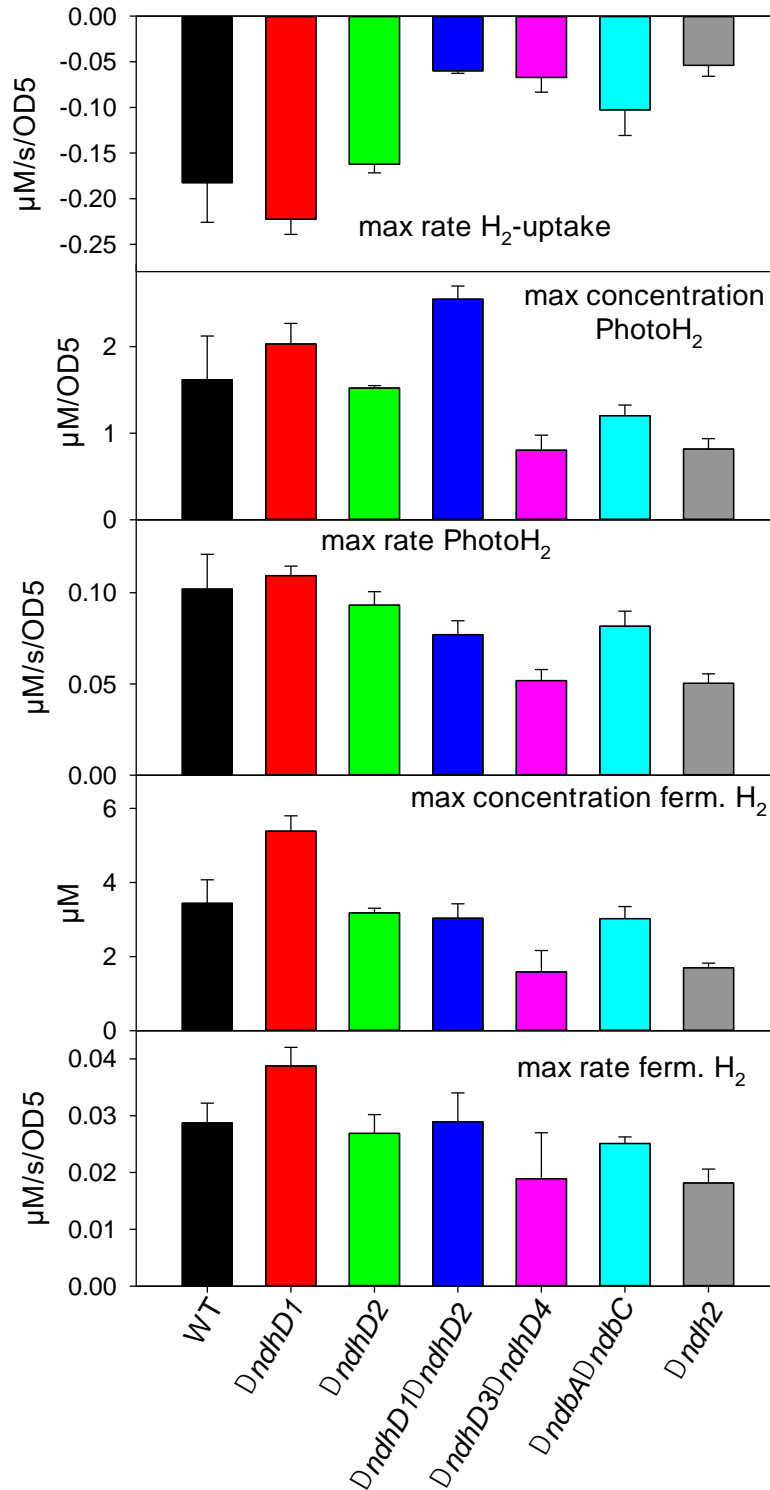

**Figure S3.** Analysis of the photoH<sub>2</sub> measurements. Experiments were performed as shown in Figure 2 for at least three different cultures of the same strain. During the course of the experiment the maximal rates of the different phases (fermentative H<sub>2</sub> production, PhotoH<sub>2</sub> production and H<sub>2</sub>-uptake) were determined as well as the maximal concentrations of produced fermentative H<sub>2</sub> and PhotoH<sub>2</sub>. Rates are given as  $\mu\text{M H}_2$  produced or consumed per second and at a density of  $\text{OD}_{750} = 5$ . The maximum of photoH<sub>2</sub> production is also given for the same density. Please note that fermentative H<sub>2</sub> production is limited by thermodynamics and thus is independent of cell density while the amount of photoH<sub>2</sub> depends on the cell density, chlorophyll concentration and shading and is given as per cell density. Error bars show the standard deviation.

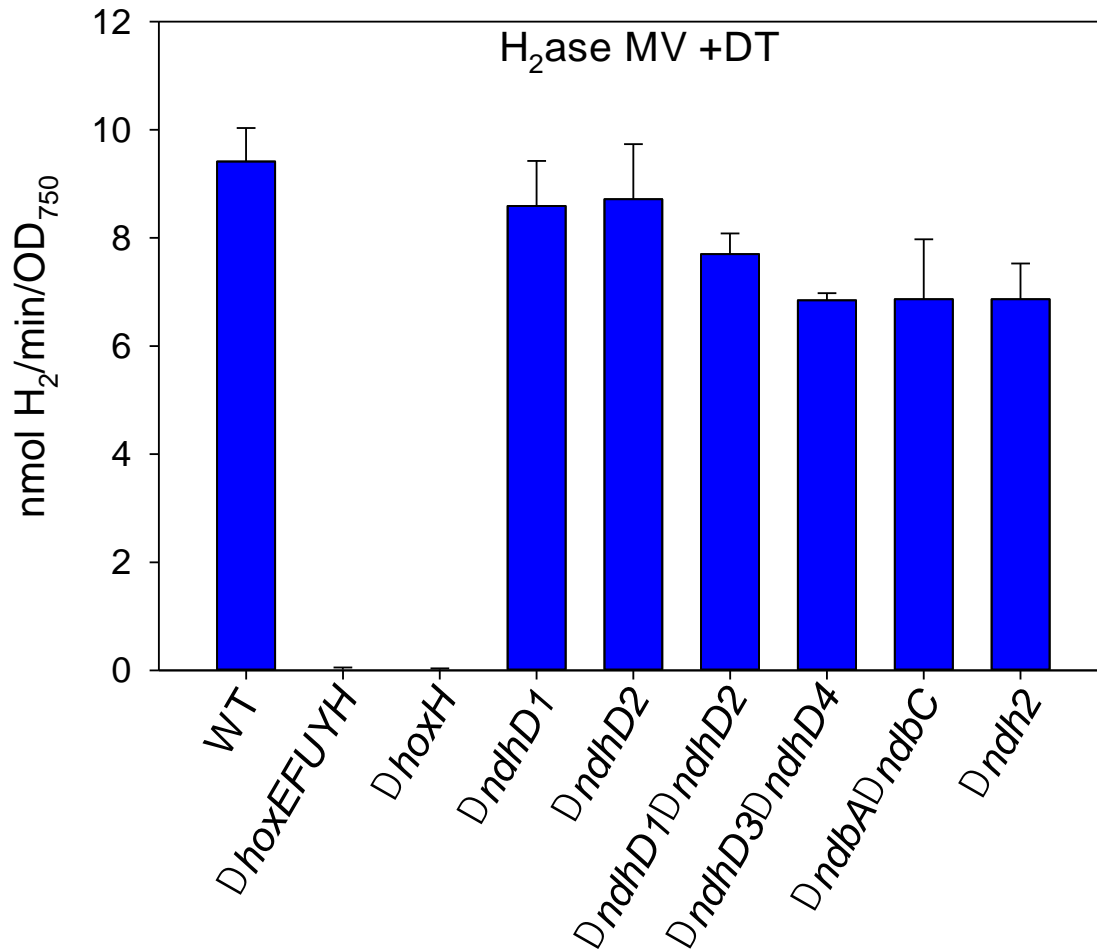

**Figure S4.** Hydrogenase activity as measured by the addition of 5 mM methylviologen and 10 mM dithionite to cell suspensions. The activity is directly proportional to the amount of hydrogenase present in the cells [14]. Error bars show the standard deviation of at least three independent biological replicates.

A

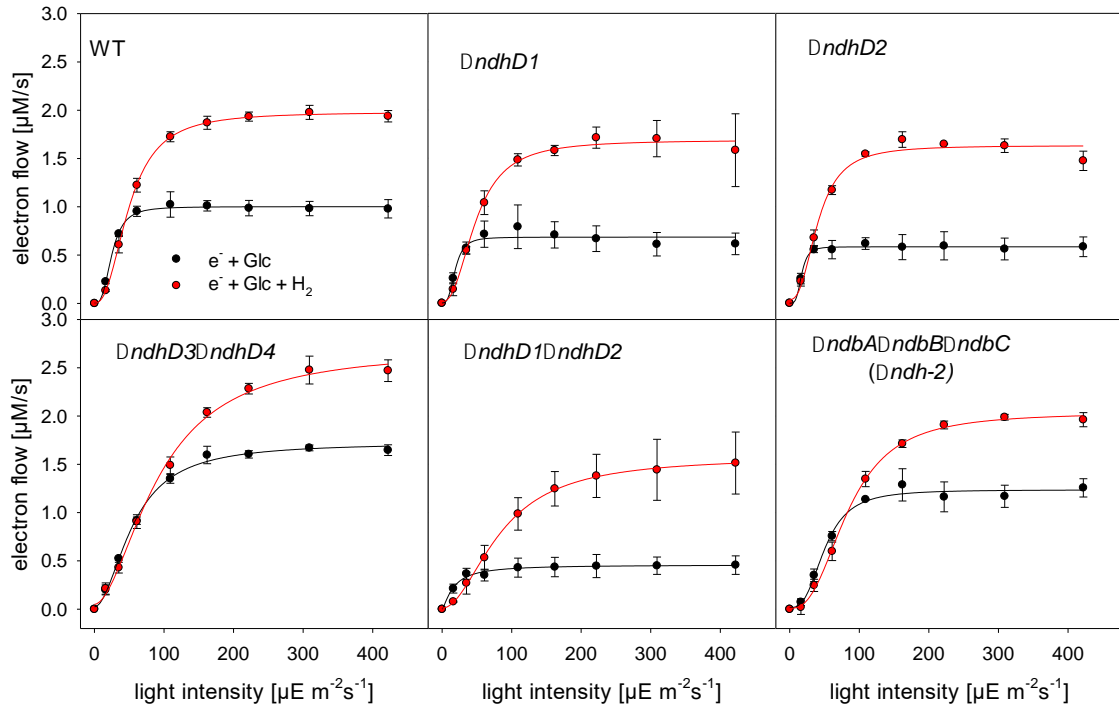

B

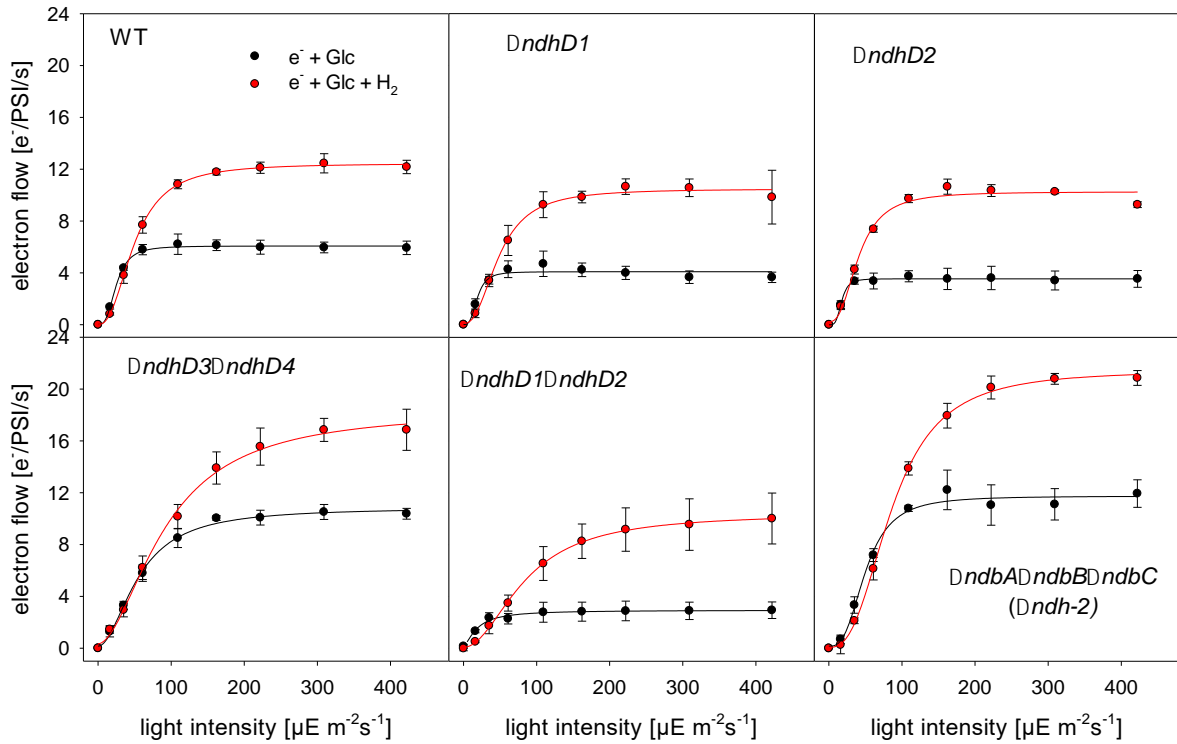

**Figure S5.** Electron flow through PSI as calculated from the DIRK measurements in the absence (black symbols and curves) and presence (red symbols and lines) of hydrogen. In (A) the values are given as μM e<sup>-</sup>/s and in (B) as e<sup>-</sup>/PSI/s. The difference of both curves in (A) is blotted in Figure 4. In A the rates are given as μM electrons/s at a cell density of OD<sub>750</sub> = 5.7. The error bars in (A) and (B) indicate the standard deviation of at least three independent cultures.

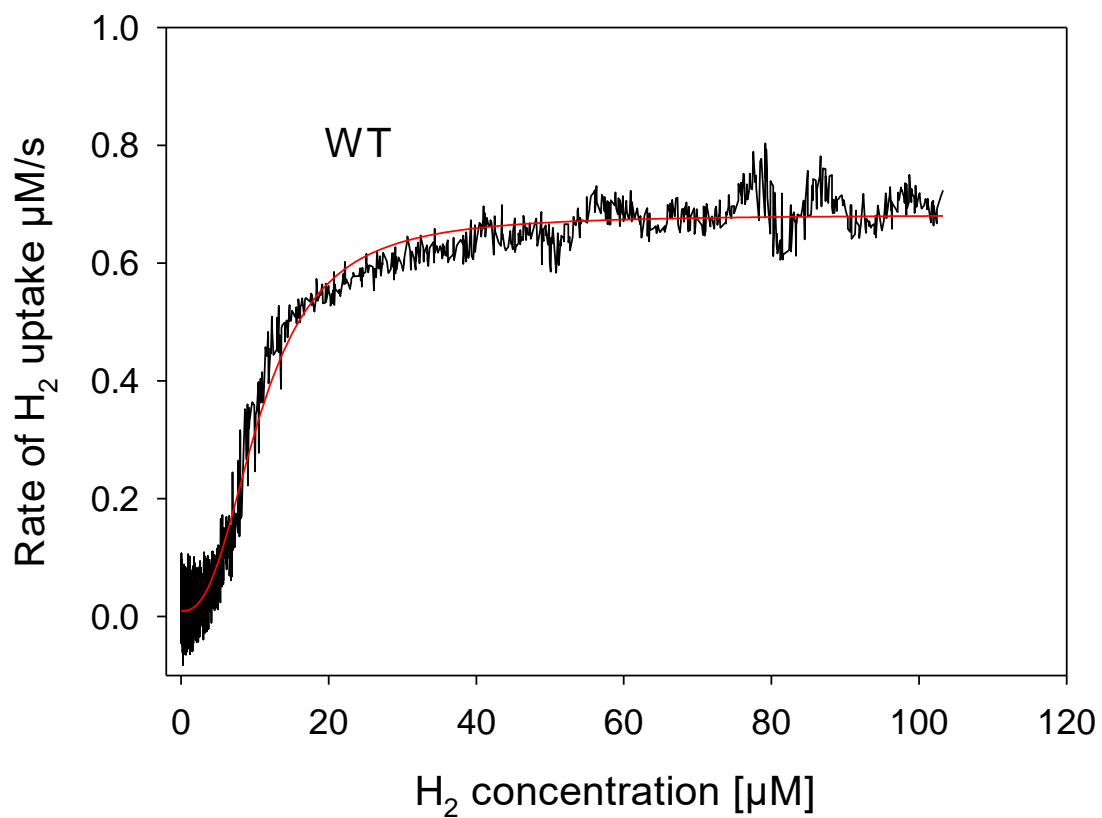

**Figure S6.** Hydrogen uptake rates plotted against actual H<sub>2</sub> concentration. H<sub>2</sub> uptake was followed in the light until completion. From the concentration curve as measured by the electrode the rate was calculated and plotted above against the H<sub>2</sub> concentration. The Michaelis-Menten blot thus gained was fitted with a Hill-equation (red line).

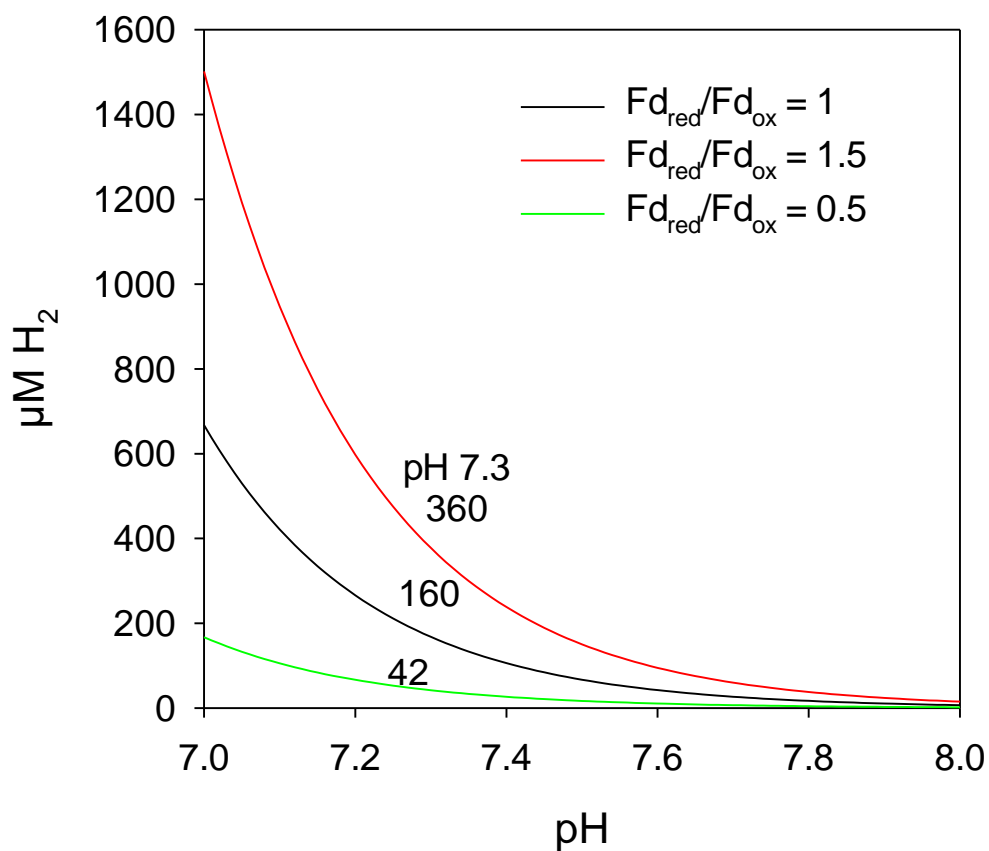

**Figure S7.**  $H_2$  concentration curves in equilibrium with a specific  $Fd_{red}/Fd_{ox}$  ratio plotted against pH. To calculate the  $H_2$  concentration that is in equilibrium with a specific ratio of reduced to oxidized ferredoxin 1 the Nernst equation was used and the data was plotted against the pH. At an intracellular pH of 7.3 the minimal concentration of hydrogen that could be reached for e.g. a ratio of  $Fd_{red}/Fd_{ox}$  of 0.5 is 42  $\mu M$ .

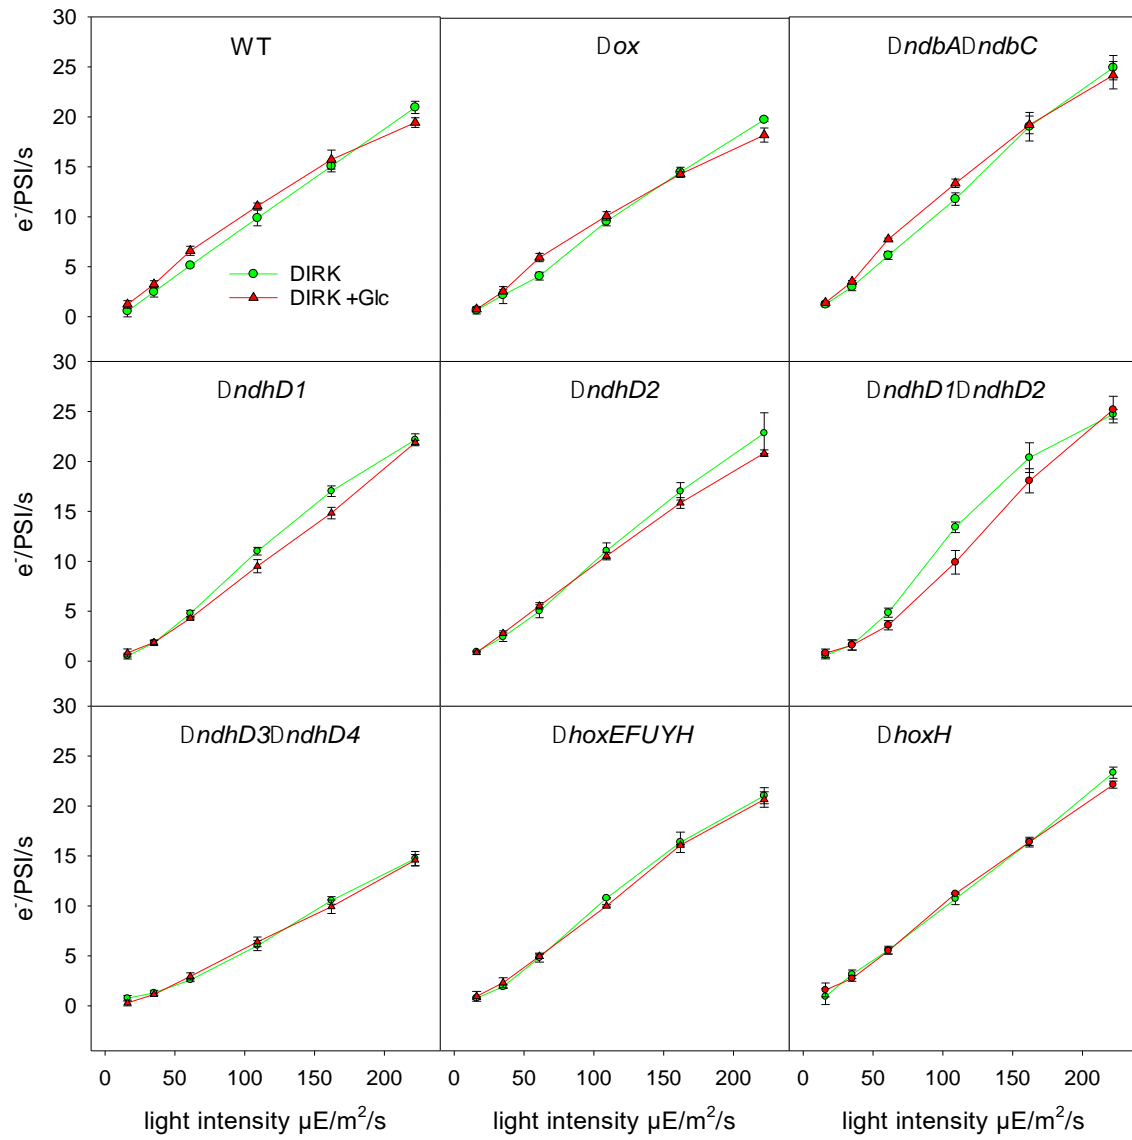

**Figure S8.** Electron flow through PSI as measured by DIRK before (green) and after (red) glucose addition. Only wild type cells, the mutant without terminal respiratory oxidases ( $\Delta ox$ ) and the mutant lacking the type 2 dehydrogenases ( $\Delta ndbA\Delta ndbC$ ) show a slightly increased electron flow after glucose addition in the range of their growth light intensity.



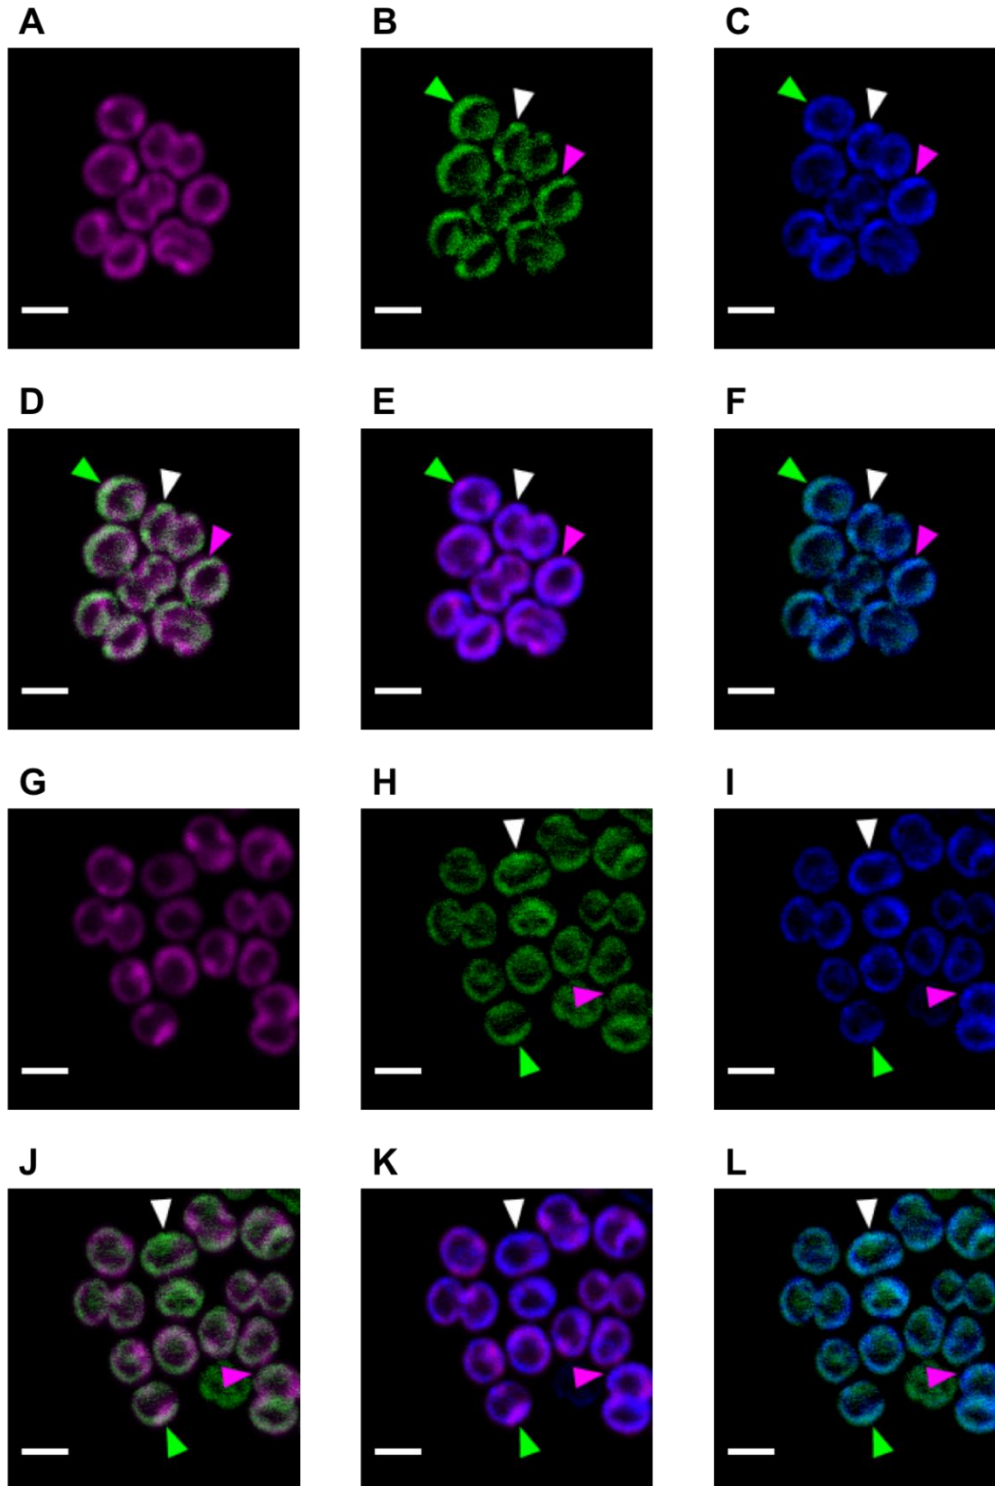

**Figure S9.** Distribution of Hox and NDH-1 in *Synechocystis* wild type cells grown photoautotrophically at  $30 \mu\text{mole photons m}^{-2} \text{s}^{-1}$  and following anoxia. Confocal fluorescence micrographs for photoautotrophic (A-C) and anoxic (G-L) showing the chlorophyll fluorescence, GFP fluorescence and YFP fluorescence respectively. Fluorescence micrograph overlays for photoautotrophic (D-F) and anoxic conditions (J-L) showing the merge of chlorophyll/GFP, chlorophyll/YFP and GFP/YFP respectively. Scale bar represent  $2 \mu\text{m}$ . (A-F) Cells grown a at  $30 \mu\text{mole photons m}^{-2} \text{s}^{-1}$ . (G-L) Cells grown at  $30 \mu\text{mole photons m}^{-2} \text{s}^{-1}$  with the addition of glucose oxidase and catalase. The chlorophyll/GFP fluorescent micrographs are overlaid with chlorophyll in magenta and GFP (Hox) in green (D & J). The chlorophyll/YFP fluorescent micrographs are overlaid with chlorophyll in red and YFP (NDH-1) in cyan. The Hox and NDH-1 fluorescent micrographs are overlaid with GFP in green and YFP in magenta. Green arrows highlight regions of Hox localisation. Magenta arrows highlight regions of NDH-1 localisation. White arrows highlight regions of Hox and NDH-1 co-localisation.

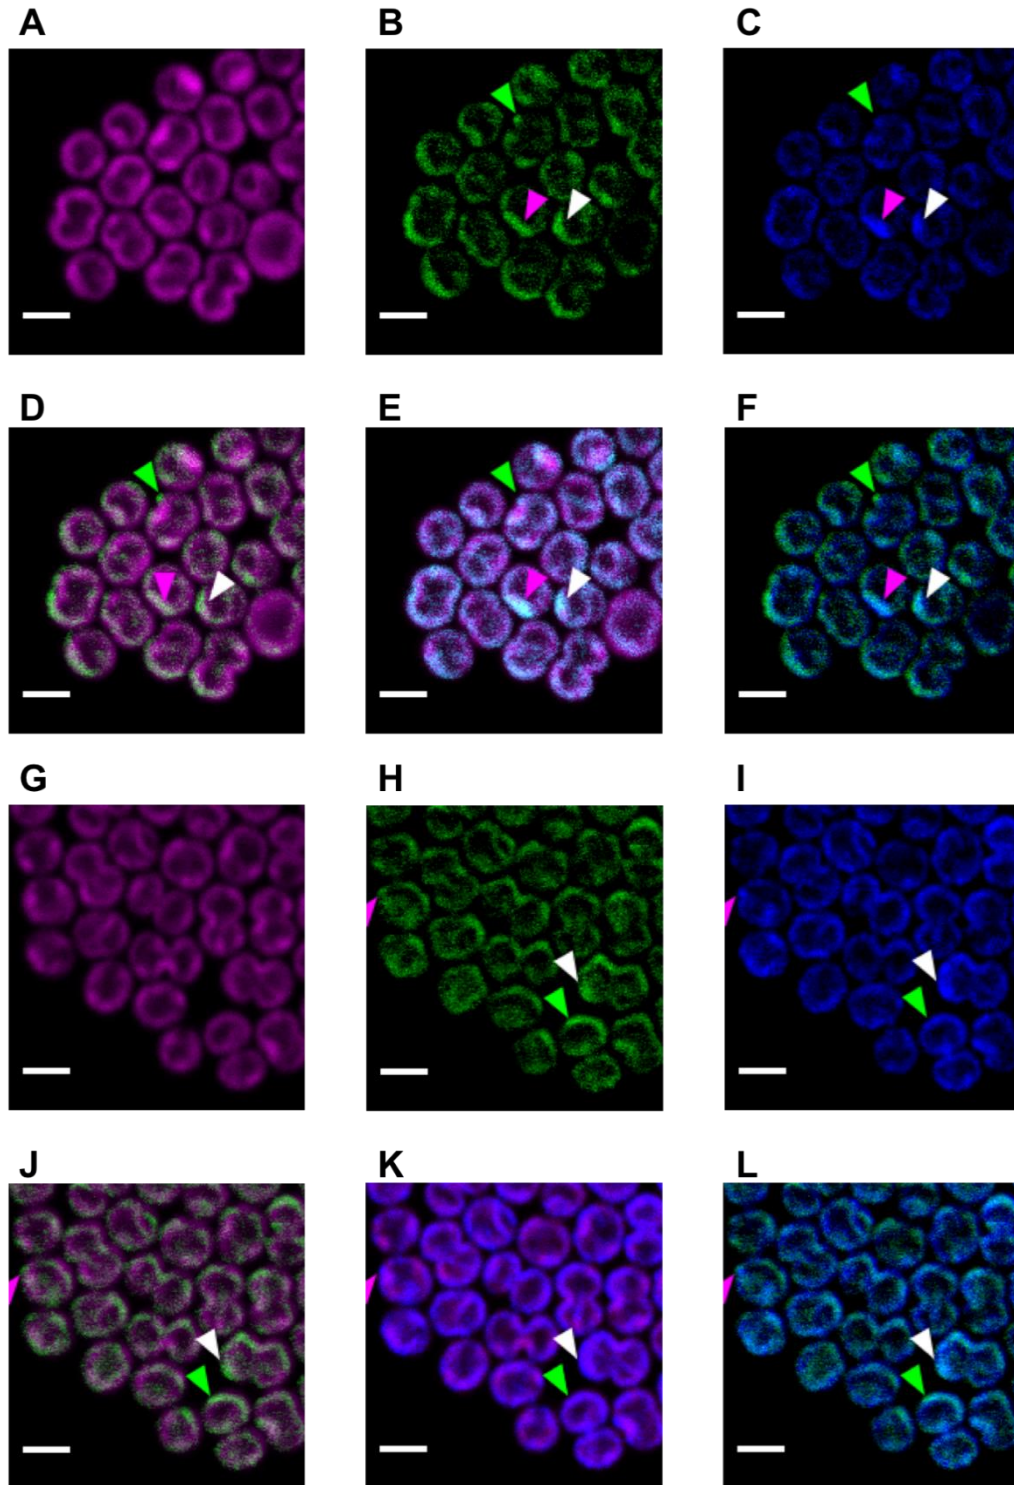

**Figure S10.** Distribution of Hox and NDH-1 in *Synechocystis*  $\Delta ndhD1\Delta ndhD2$  grown photoautotrophically at  $30 \mu\text{mole photons m}^{-2} \text{s}^{-1}$  and following anoxia (A-L). Confocal fluorescence micrographs for photoautotrophic (A-C) and anoxic (G-I) showing chlorophyll fluorescence, GFP fluorescence and YFP fluorescence respectively. Fluorescence micrograph overlays for photoautotrophic growth (D-F) and anoxic conditions (J-L) showing the merge of chlorophyll/GFP, chlorophyll/YFP and GFP/YFP respectively. Scale bar represents  $2 \mu\text{m}$ . (A-F) Cells grown a at  $30 \mu\text{mole photons m}^{-2} \text{s}^{-1}$ . (G-L) Cells grown at  $30 \mu\text{mole photons m}^{-2} \text{s}^{-1}$  with the addition of glucose oxidase and catalase. The chlorophyll/GFP fluorescent micrographs are overlaid with chlorophyll in magenta and GFP (hox) in green (D & J). The chlorophyll/YFP fluorescent micrographs are overlaid with chlorophyll in red and YFP(NDH-1) in cyan. The Hox and NDH-1 fluorescent micrographs are overlaid with GFP in green and YFP in magenta. Green arrows highlight regions of Hox localisation. Magenta arrows highlight regions of NDH-1 localisation. White arrows highlight regions of Hox and NDH-1 colocalization.

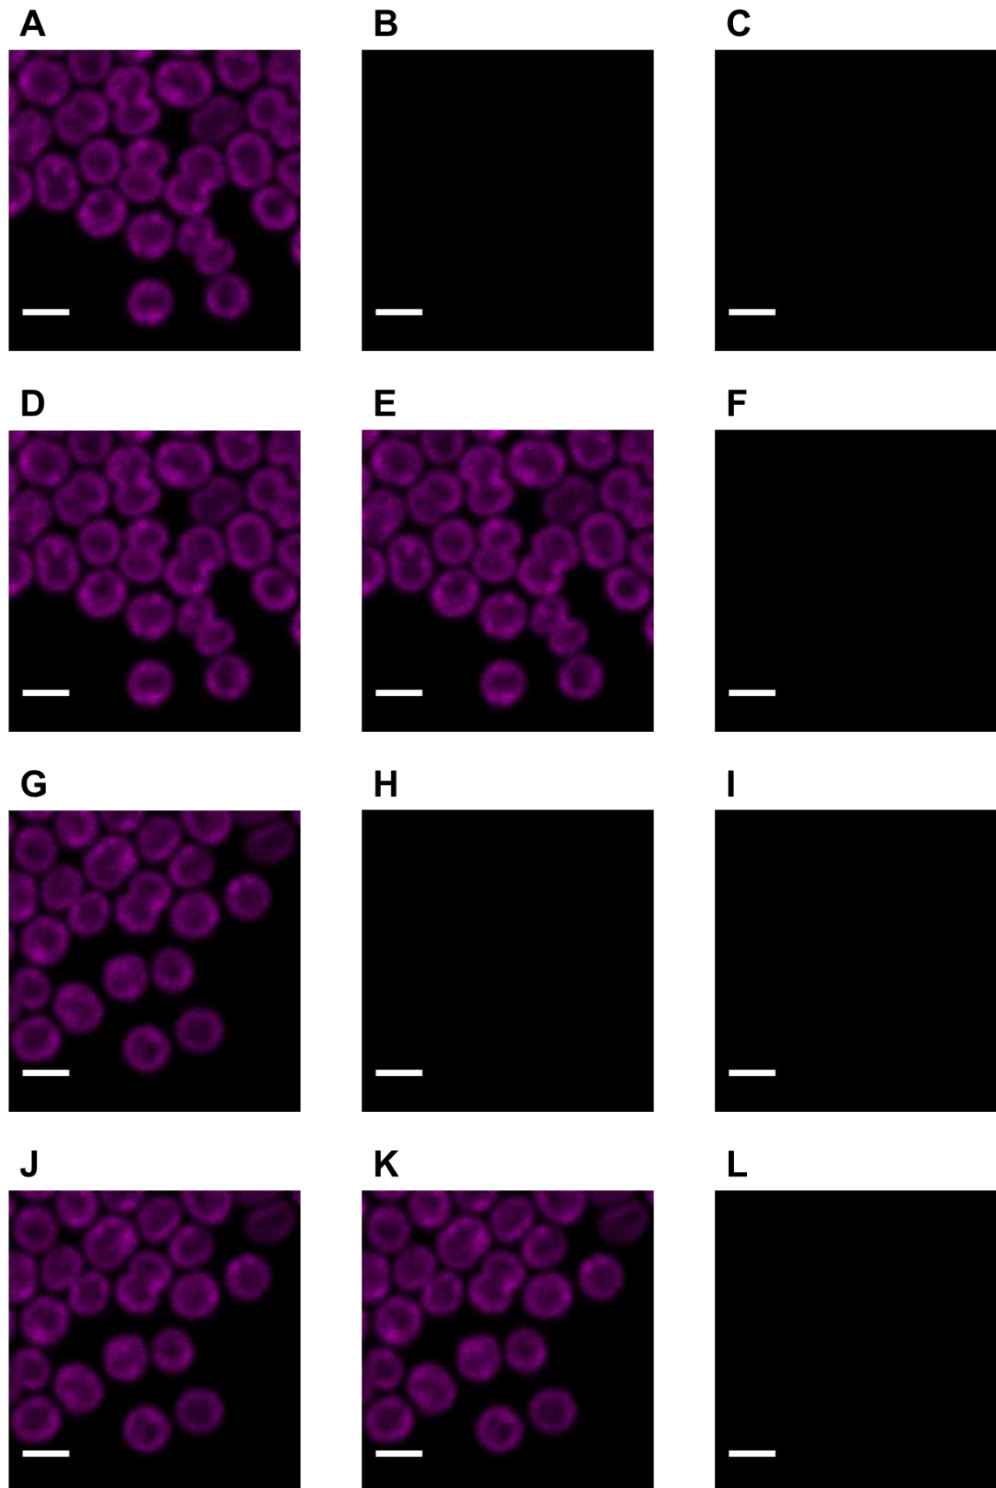

**Figure S11.** Assessment of autofluorescence in *Synechocystis* wild type cells grown photoautotrophically at 30  $\mu\text{E}/\text{m}^2/\text{s}$  and following anoxia. Confocal fluorescence micrographs for photoautotrophic (A-C) and anoxic (G-I) conditions showing photosynthetic pigment fluorescence, GF-fluorescence and YFP-fluorescence, respectively. Fluorescence micrograph overlay for photoautotrophic (D-F) and anoxic conditions (J-L) showing the merge of photosynthetic pigments/GFP, photosynthetic pigments/YFP and GFP/YFP, respectively. Scale bar represents 2  $\mu\text{m}$ . (A-F) cells grown at 30  $\mu\text{E}/\text{m}^2/\text{s}$ . (G-L) cells grown at 30  $\mu\text{E}/\text{m}^2/\text{s}$  with the addition of glucose, glucose oxidase and catalase.

Table S1: Primers used in this study for plasmid construction and PCR screening.

| Primer name | sequence                                                 | Fragment amplified            | construct                                                                                                                           |
|-------------|----------------------------------------------------------|-------------------------------|-------------------------------------------------------------------------------------------------------------------------------------|
| coxout1     | CTATAGGGCGAATTGGGTACATTACGGTTAAAGCAGGAT                  | upstream recombination-site   | Deletion of <i>ctaDI</i> ( <i>slr1137</i> )                                                                                         |
| coxin1      | AGAGATTTATCTAATTTCTTTTTTCGTCGACGATTCTCAGCGGCAATAGTCATAAA |                               |                                                                                                                                     |
| Em1         | GTCGACGAAAAAAGAAATTAGATAAA                               | Em-cassette                   |                                                                                                                                     |
| Em2         | GTCGACTTACTTATTAATAATTTATAGC                             |                               |                                                                                                                                     |
| coxin2      | GCTATAAATTATTTAATAAGTAAGTCGACGATGCGGCAGGAAGTTAGTTT       | downstream recombination-site |                                                                                                                                     |
| coxout2     | AGGGAACAAAAGCTGGAGCTGGCATCACACTGCGATAAAT                 |                               |                                                                                                                                     |
| cydout1     | CTATAGGGCGAATTGGGTACAGAAGGAGTTTACGATCGCCAA               | upstream recombination site   | Deletion of <i>cydA</i> and <i>cydB</i> ( <i>slr1379</i> and <i>slr1380</i> )                                                       |
| cydin1      | TTGGCACCCAGCCTGCGCGATTACTCAAAAAATCCTGCATCTGTAA           | Sp-cassette                   |                                                                                                                                     |
| Sp-KG       | TCGCGCAGGCTGGGTGCCAA                                     |                               |                                                                                                                                     |
| Sp-rev      | GCCCTCGCTAGATTTTAATGCGGAT                                | downstream recombination site |                                                                                                                                     |
| cydin2      | ATCCGCATTAAAATCTAGCGAGGGCAAATTTGTCACCGACTAGGGAGTT        |                               |                                                                                                                                     |
| cydout2     | AGGGAACAAAAGCTGGAGCTTGCAACGGGTGAGCATCCAATTT              |                               |                                                                                                                                     |
| ARTOout1    | CTATAGGGCGAATTGGGTACCTGGATCAGCTAATTACCCTAATTAGTA         | upstream recombination site   | deletion of <i>ctaDII</i> and <i>ctaEII</i> of the alternative respiratory terminal oxidase ( <i>slr2082</i> , and <i>slr2083</i> ) |
| ARTOin1Gm   | GGTTCGTGCCTTCATCCGTCGACAGCGGGAAAGGGCAGTGCTTGTTT          | Gm-cassette                   |                                                                                                                                     |
| Gm1         | GTCGACGGATGAAGGCACGAACC                                  |                               |                                                                                                                                     |
| Gm2         | GTCGACCGAATTGTTAGGTGGCG                                  | downstream recombination site |                                                                                                                                     |
| ARTOin2Gm   | CGCCACCTAACAAATTCGGTCGACCCAGCGAATTAATCTTTGGCAT           |                               |                                                                                                                                     |
| ARTOout2    | AGGGAACAAAAGCTGGAGCTCTAGAATTCACAGTCATAGGCAA              |                               |                                                                                                                                     |
| ndbAout1    | CTATAGGGCGAATTGGGTACAATATTTTCGCCGTTGCTATGAA              | upstream recombination site   | deletion of <i>ndbA</i> ( <i>slr0851</i> )                                                                                          |
| ndbAin1     | GGTTCGTGCCTTCATCCGTCGACGCATGGTCCTCCAACACCACTTT           | Gm-cassette                   |                                                                                                                                     |
| Gm1         | GTCGACGGATGAAGGCACGAACC                                  |                               |                                                                                                                                     |
| Gm2         | GTCGACCGAATTGTTAGGTGGCG                                  | downstream recombination site |                                                                                                                                     |
| ndbAin2     | CGCCACCTAACAAATTCGGTCGACTAATATATTTGTCCTGGGGGATTT         |                               |                                                                                                                                     |
| ndbAout2    | AGGGAACAAAAGCTGGAGCTAGCTATGGTGGGGTTTACCGAA               |                               |                                                                                                                                     |
| ndbBout1    | CTATAGGGCGAATTGGGTACCCACCAAAGGCGATCGCCACTTA              | upstream recombination site   | deletion of <i>ndbB</i> ( <i>slr1743</i> )                                                                                          |
| ndbBin1     | TCAATAATATCGAATTCCTGCAGCCGTGGTCGAGCGTCCGTCATAAT          | Cm-cassette                   |                                                                                                                                     |
| Cm1         | CTGCAGGAATTCGATATTATTG                                   |                               |                                                                                                                                     |
| Cm2         | AAGCTTGATGGCGGCACCTCGCT                                  | downstream recombination site |                                                                                                                                     |
| ndbBin2     | AGCGAGGTGCCGCATCAAGCTTAAAAATGAACCTTCCTGAGGGAAA           |                               |                                                                                                                                     |
| ndbBout2    | AGGGAACAAAAGCTGGAGCTATGGGGGTGGTAATAGGCCATT               |                               |                                                                                                                                     |
| ndbCout1    | CTATAGGGCGAATTGGGTACAATCACCGCCGCCAGGTTCAAT               |                               | deletion of <i>ndbC</i> ( <i>slr1484</i> )                                                                                          |

|                  |                                                             |                                |                                             |  |
|------------------|-------------------------------------------------------------|--------------------------------|---------------------------------------------|--|
| <i>ndbCin1</i>   | TTGGCACCCAGCCTGCGCGAAAAGTGGGGCCAATTTCTCTGGAAA               | upstream recombination site    |                                             |  |
| Sp-KG            | TCGCGCAGGCTGGGTGCCAA                                        | Sp-cassette                    |                                             |  |
| Sp-rev           | GCCCTCGCTAGATTTTAATGCGGAT                                   |                                |                                             |  |
| <i>ndbCin2</i>   | ATCCGCATTAAAAATCTAGCGAGGGCACCGGAAAAGGGAAAGGGCTCCTT          | downstream recombination site  | deletion of <i>sdhB1</i> ( <i>sll1625</i> ) |  |
| <i>ndbCout2</i>  | AGGGAACAAAAGCTGGAGCTGGACAATGATGGGATGGAGGGTAT                | upstream recombination site    |                                             |  |
| <i>sdhB1out1</i> | CTATAGGGCGAATTGGGTACGACAGTTCTGCTTCCGGTCAA                   | upstream recombination site    |                                             |  |
| <i>sdhB1in1</i>  | GGTTCGTGCCTTCATCCGTCGACATTTTGCAAACAATTTCCATGGTA             | Gm-cassette                    |                                             |  |
| Gm1              | GTCGACGGATGAAGGCACGAACC                                     |                                |                                             |  |
| Gm2              | GTCGACCGAATTGTTAGGTGGCG                                     |                                |                                             |  |
| <i>sdhB1in2</i>  | CGCCACCTAACAATTCGGTCGACTTCGTTTATTTGACTTGATGGAT              | downstream recombination site  | deletion of <i>sdhB2</i> ( <i>sll0823</i> ) |  |
| <i>sdhB1out2</i> | AGGGAACAAAAGCTGGAGCTTGAGCTGGCAATTTTGATGT                    | upstream recombination site    |                                             |  |
| <i>sdhB2out1</i> | CTATAGGGCGAATTGGGTACGAGAGTTTGGCCAAAAGTTGA                   | upstream recombination site    |                                             |  |
| <i>sdhB2in1</i>  | TCAATAATATCGAATTCCTGCAGCTGTTGCGGTTTTTGGCGCAA                | Cm-cassette                    |                                             |  |
| Cm1              | CTGCAGGAATTCGATATTATTG                                      |                                |                                             |  |
| Cm2              | AAGCTTGATGGCGGCACCTCGCT                                     |                                |                                             |  |
| <i>sdhB2in2</i>  | AGCGAGGTGCCGCCATCAAGCTTGCGGAAAAACTTGCCAATTTCT               | downstream recombination site  | construct for GFP-labelling of HoxF         |  |
| <i>sdhB2out2</i> | AGGGAACAAAAGCTGGAGCTTAACCGTTCCAATCGACTTT                    | upstream recombination site    |                                             |  |
| HoxF_Up_F        | ACTAGTGAATTCGCGGCCGCTGCAAATGTACAAAATCCCACC                  | GFP and apramycin cassette     |                                             |  |
| HoxF_Up_R        | CGGGCCCCGCGAGGACTTTGAGTAATTCTTCATATTC                       |                                |                                             |  |
| HoxF_GFP_F       | ATTACTCAAAGTCCTGCCGGGCCGAGCTG                               | downstream recombination site  |                                             |  |
| HoxF_GFP_R       | ATAAATTACCGAAATTCGGGGATCCGTCGACCTG                          |                                |                                             |  |
| HoxF_Down_F      | GATCCCCGGAATTTGCGTAATTTATCCACTCAG                           |                                |                                             |  |
| HoxF_Down_R      | CTATGCATCCAACGCGTTGGGAGCTCATGATTGCCTTCGGAAAAAAG             | PCR screening                  | construct for YFP-labelling of NdhM         |  |
| HoxF_SC_F        | TGTGGATTGGGGATGAGTGC                                        |                                |                                             |  |
| HoxF_SC_R        | TCCCAATGACCGGGTTTACG                                        |                                |                                             |  |
| NdhM_Up_F        | ACTAGTGAATTCGCGGCCGCTGCACCCAGCTTGGGCACTGT                   | upstream recombination site    |                                             |  |
| NdhM_Up_R        | GGGCCCCGCGAGCGTTATCCAGCCAATATTTTCTGCAGTTTC                  | YFP and spectinomycin cassette |                                             |  |
| NdhM_YFP_F       | TTGGCTGGATAACGCTGCCGGGCCGAGCT                               |                                |                                             |  |
| NdhM_YFP_R       | AATTGATACCAAGTGTAGGCTGGAGCTGCTTGAAGTTCCTATACTTTCTAGAGAATAGG |                                |                                             |  |
| NdhM_Down_F      | CTCCAGCCTACACTTGGTATCAATTGACCATAACTGGAGGGAG                 | downstream recombination site  |                                             |  |
| NdhM_Down_R      | CTATGCATCCAACGCGTTGGGAGCTAAGGGGCGGTCCAAGCCG                 | PCR screening                  |                                             |  |
| NdhM_SC_F        | TGGCTCGGATTTGGAGCATT                                        |                                |                                             |  |
| NdhM_SC_R        | GCACAGTGTTAAGCCTCCCT                                        |                                |                                             |  |
